# Supplementary material for: Effects of growth hormone on cardiac remodeling and soleus muscle in rats with aortic stenosis-induced heart failure
Source: PubMed Central journal article supplement (PMC5669945; doi:10.18632/oncotarget.20583), 2017-08-24
Supplement: oncotarget-08-83009-s001.pdf [file oncotarget-08-83009-s001.pdf]

## Effects of growth hormone on cardiac remodeling and soleus muscle in rats with aortic stenosis-induced heart failure

### SUPPLEMENTARY MATERIALS

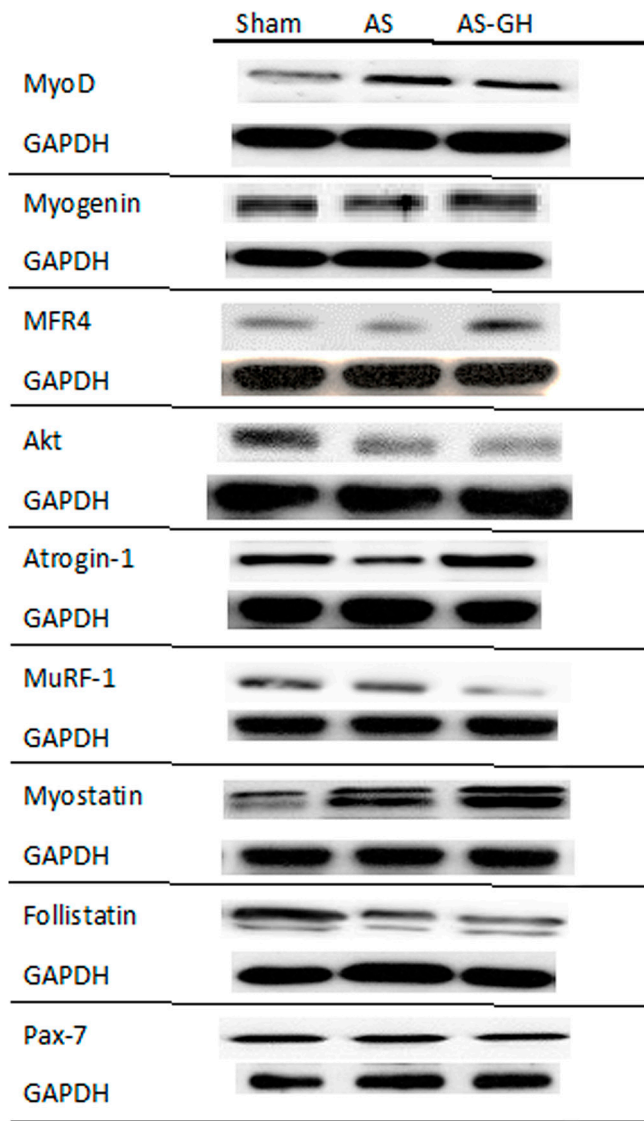

**Supplementary Figure 1: Representative immunoblots of soleus muscle proteins analyzed by Western blot.** Quantitative results are shown in Table 4. AS: aortic stenosis; AS-GH: aortic stenosis treated with growth hormone.
